# Supplementary material
Source: PubMed Central journal article supplement (PMC1829243)
Supplement: pnas_0700257104_1.pdf [file pnas_0700257104_1.pdf]

**Table 1. Chemically induced spectrin-actin dissociation**

| Energy hit-rate,<br>1/ $\mu$ s/spectrin | Shear strain at first plastic<br>displacement burst, % | Shear modulus, $\mu$ N/m |
|-----------------------------------------|--------------------------------------------------------|--------------------------|
| 0                                       | 95                                                     | 10                       |
| 0.5                                     | 90                                                     | 9                        |
| 1                                       | 88                                                     | 9                        |
| 1.5                                     | 80                                                     | 9                        |
| 2                                       | 65                                                     | 9                        |
| 2.5                                     | 40                                                     | 8.5                      |
| 3                                       | 45                                                     | 8                        |
| 3.5                                     | 20                                                     | 8                        |
| 4                                       | 20                                                     | 8                        |
| 4.5                                     | 15                                                     | 7                        |
| 5                                       | 15                                                     | 7                        |
| 5.5                                     | 20                                                     | 7                        |
| 6.5                                     | 10                                                     | 7                        |
| 7.5                                     | 10                                                     | 6                        |
| 8.5                                     | 10                                                     | 6                        |
| 9.5                                     | 10                                                     | 6                        |
| 10                                      | 10                                                     | 5.3                      |
