# Supplementary material
Source: PubMed Central journal article supplement (PMC1829243)
Supplement: pnas_0700257104_2.pdf [file pnas_0700257104_2.pdf]

**Table2. Strain rate effect on shear strain at first plastic displacement burst ( $\epsilon = 0.43$  eV,  $H = 1/\mu\text{s/spectrin}$ ,  $X = 0.5\text{eV}$ )**

| $\dot{\gamma}$ ,<br>1/ $\mu\text{s}$ | $\dot{\gamma}\tau_g$ | Shear strain $\gamma_F$ at first plastic<br>displacement burst, % | Shear modulus,<br>$\mu\text{N/m}$ |
|--------------------------------------|----------------------|-------------------------------------------------------------------|-----------------------------------|
| 0.03                                 | 0.003                | 9                                                                 | 8                                 |
| 0.05                                 | 0.005                | 17                                                                | 8                                 |
| 0.1                                  | 0.01                 | 31                                                                | 8                                 |
| 0.14                                 | 0.014                | 57                                                                | 8                                 |
| 0.2                                  | 0.02                 | 63                                                                | 8                                 |
| 0.3                                  | 0.03                 | 63                                                                | 8                                 |
