# Supplementary material
Source: PubMed Central journal article supplement (PMC1829243)
Supplement: pnas_0700257104_3.pdf [file pnas_0700257104_3.pdf]

**Table 3. Shear induced cytoskeleton defect**

| Dimer – dimer energy association, eV | Network integrity, % | Shear strain at first plastic displacement burst, % | Shear modulus, $\mu\text{N/m}$ |
|--------------------------------------|----------------------|-----------------------------------------------------|--------------------------------|
| 0.6                                  | 99                   | 90                                                  | 9                              |
| 0.56                                 | 98.4                 | 50                                                  | 8                              |
| 0.51                                 | 95                   | 40                                                  | 5                              |
| 0.49                                 | 93                   | 30                                                  | 5                              |
| 0.47                                 | 91                   | 20                                                  | 4                              |
